# Supplementary material for: Changes in Typical Portion Sizes of Commonly Consumed Discretionary Foods among Australian Adults from 1995 to 2011–2012
Source: MDPI journal article supplement (doi:10.3390/nu9060577), 2017-06-06
Supplement: s1 [file s1]

## Supplementary materials

**Table S1. Discretionary food categories included in this analysis**

| <b>Discretionary food categories</b> | <b>Subcategories</b>                                                                                                                                                                                                 |
|--------------------------------------|----------------------------------------------------------------------------------------------------------------------------------------------------------------------------------------------------------------------|
| Pizza                                | Thin or thick crust, any topping                                                                                                                                                                                     |
| Cake                                 | Cakes, cake-type muffins, slices, scones and rock cakes                                                                                                                                                              |
| Sausage                              | Sausages, frankfurts and saveloys                                                                                                                                                                                    |
| Processed meat                       | Bacon, ham and luncheon meats                                                                                                                                                                                        |
| Ice cream                            | Vanilla ice cream, chocolate ice cream, other sweet-based ice cream, fruit-flavoured ice cream, ice cream cakes/cups/ cones/stick, gelato                                                                            |
| Cereal bar                           | Muesli and cereal bar                                                                                                                                                                                                |
| Biscuit                              | Sweet biscuits: chocolate, jam filled, fruit filled, choc-chip, plain sweet unfilled, chocolate coated, Shortbread style, Gingerbread, fruit and nuts, other toppings;<br>Savoury biscuits: plain energy>1800kJ/100g |
| Chocolate                            | Chocolate-based confectionery: plain chocolate, chocolate with nuts, chocolate bars, other chocolate-based confectionery                                                                                             |
| Pastries                             | Sweet pastries, fruit or nut filling, egg or dairy based filling, quiches and flans, savoury pastries, pies, rolls and envelopes                                                                                     |
| Snack food                           | Potato crisps, popcorn, corn chips, extruded snacks                                                                                                                                                                  |
| Potato fries                         | Fries and wedges                                                                                                                                                                                                     |
| Wine                                 | Red wine, rose, white wine and sparkling                                                                                                                                                                             |
| Sugar-sweetened beverage             | Soft drinks, fruit drinks, cordials, sport/energy drinks                                                                                                                                                             |
| Beer                                 | Regular and reduced alcohol beer                                                                                                                                                                                     |

**Table S2. Comparison of typical portion sizes (in kJ) of discretionary foods in 1995 and 2011-12**

| Food categories | 1995 |             |             |           |      | 2011 |             |             |           |      | Percentage difference between median |
|-----------------|------|-------------|-------------|-----------|------|------|-------------|-------------|-----------|------|--------------------------------------|
|                 | n    | Median (kJ) | IQR         | Mean (kJ) | SD   | n    | Median (kJ) | IQR         | Mean (kJ) | SD   |                                      |
| <i>Foods</i>    |      |             |             |           |      |      |             |             |           |      |                                      |
| Pizza           | 485  | 1432        | 883 , 2539  | 1919      | 1519 | 466  | 2382        | 1559 , 3613 | 2757      | 1651 | 66*                                  |
| Cake            | 2467 | 868         | 515 , 1431  | 1143      | 1002 | 1540 | 1437        | 798 , 2136  | 1584      | 1088 | 66*                                  |
| Ice cream       | 1436 | 575         | 342 , 980   | 772       | 609  | 1149 | 802         | 450 , 1040  | 852       | 554  | 39*                                  |
| Sausage         | 974  | 945         | 591 , 1418  | 1153      | 856  | 611  | 1215        | 913 , 1994  | 1530      | 863  | 29*                                  |
| Processed meat  | 3280 | 188         | 104 , 352   | 299       | 391  | 1989 | 234         | 79 , 479    | 374       | 446  | 24*                                  |
| Cereal bar      | 181  | 481         | 465 , 541   | 554       | 195  | 483  | 562         | 531 , 771   | 689       | 307  | 17*                                  |
| Chocolate       | 2070 | 428         | 233 , 870   | 627       | 633  | 2138 | 441         | 239 , 882   | 663       | 720  | 3                                    |
| Biscuit         | 3960 | 380         | 255 , 625   | 501       | 425  | 3150 | 388         | 252 , 685   | 533       | 547  | 2                                    |
| Pastry          | 1840 | 1599        | 1035 , 1956 | 1674      | 1125 | 1113 | 1431        | 943 , 1650  | 1420      | 871  | -10*                                 |
| Snack food      | 796  | 630         | 447 , 1085  | 1479      | 826  | 827  | 538         | 346 , 1058  | 1040      | 910  | -15*                                 |
| Potato fries    | 1567 | 1440        | 1030 , 1746 | 857       | 693  | 1045 | 870         | 449 , 1393  | 913       | 953  | -40*                                 |
|                 |      |             |             |           |      |      |             |             |           |      |                                      |
| Wine            | 1549 | 707         | 471 , 1062  | 856       | 634  | 1555 | 962         | 642 , 1534  | 1209      | 901  | 36*                                  |
| Beer            | 1804 | 890         | 563 , 1690  | 1308      | 1183 | 1249 | 1007        | 542 , 1625  | 1308      | 1170 | 13                                   |
| SSB             | 3338 | 598         | 427 , 785   | 668       | 448  | 2763 | 589         | 437 , 718   | 648       | 413  | -2                                   |

IQR: interquartile range, SD standard deviation

\* $P < 0.05$

**Table S3. Percentage difference in typical portion size (g) between 1995 and 2011-2012 by age and socioeconomic status groups**

|                  | Age groups |        |        |      | Socioeconomic status (SES) |         |         |         |         |
|------------------|------------|--------|--------|------|----------------------------|---------|---------|---------|---------|
|                  | 19-30y     | 31-50y | 51-70y | 71y+ | SEIFA 1                    | SEIFA 2 | SEIFA 3 | SEIFA 4 | SEIFA 5 |
| <i>Foods</i>     |            |        |        |      |                            |         |         |         |         |
| Pizza            | 45*        | 68*    | 97*    | 60*  | 36*                        | 30*     | 51*     | 63*     | 61*     |
| Cake             | 42*        | 44*    | 64*    | 62*  | 57*                        | 33*     | 48*     | 70*     | 56*     |
| Sausage          | 62*        | 50*    | 25*    | 20*  | 7*                         | 15*     | 20*     | 69*     | 31*     |
| Processed meat   | 7          | 17*    | 20*    | 10   | 10                         | 13      | 11      | 13      | 25*     |
| Ice cream        | -11        | 13     | 33*    | 20*  | 25*                        | 8       | -5      | 18*     | 21*     |
| Cereal bar       | 3          | 1      | 10     | 0    | -3                         | 3       | 10      | 5       | 3       |
| Biscuit          | 20*        | -5     | 4      | 12   | 4                          | 0       | 9       | -5      | -6      |
| Chocolate        | -6         | 0      | 15     | 33*  | 0                          | 9       | 9       | -6      | 0       |
| Pastry           | -19*       | -15*   | -2     | -19* | 1                          | -21*    | -9      | -29*    | -19*    |
| Snack food       | -11        | 0      | -14    | -18  | -10                        | -7      | -36*    | -3      | -17*    |
| Potato fries     | -34*       | -35*   | -38*   | -43* | -39*                       | -35*    | -39*    | -38*    | -41*    |
| <i>Beverages</i> |            |        |        |      |                            |         |         |         |         |
| Wine             | 20*        | 20*    | 25*    | 31*  | 3                          | 29*     | 19*     | 20*     | 19*     |
| SSB              | 0          | 15*    | 38*    | 0    | -7                         | 4       | 12      | -1      | 19*     |
| Beer             | -12        | 0      | 0      | 6    | 0                          | 1       | 0       | -11     | -13     |

\*P<0.05 Comparison of typical portion size from 1995 to 2011-12 among age and SES groups
